1 **Overdominant mutations restrict adaptive loss of heterozygosity at linked loci**

2

3 Kaitlin J. Fisher<sup>1,2</sup>, Ryan C. Vignogna<sup>1</sup>, and Gregory I. Lang<sup>1,\*</sup>

4

5 <sup>1</sup> Department of Biological Sciences, Lehigh University, Bethlehem PA 18015

6 <sup>2</sup> Laboratory of Genetics, University of Wisconsin-Madison, Madison WI 53706

7 \* Author for Correspondence: [glang@lehigh.edu](mailto:glang@lehigh.edu)

8

9 ORCID: 0000-0002-7536-0508 (K.J.F.),

10 0000-0001-5943-6464 (R.C.V.),

11 0000-0002-7931-0428 (G.I.L)

12

13

14 **ABSTRACT**

15 **Loss of heterozygosity is a common mode of adaptation in asexual diploid**  
16 **populations. Because mitotic recombination frequently extends the full length of a**  
17 **chromosome arm, the selective benefit of loss of heterozygosity may be**  
18 **constrained by linked heterozygous mutations. In a previous laboratory evolution**  
19 **experiment with diploid yeast, we frequently observed homozygous mutations in**  
20 **the *WHI2* gene on the right arm of Chromosome XV. However, when heterozygous**  
21 **mutations arose in the *STE4* gene, another common target on Chromosome XV,**  
22 **loss of heterozygosity at *WHI2* was not observed. Here we show that mutations at**  
23 ***WHI2* are partially dominant and that mutations at *STE4* are overdominant. We test**  
24 **whether beneficial heterozygous mutations at these two loci interfere with one**  
25 **another by measuring loss of heterozygosity at *WHI2* over 1,000 generations for**  
26 **~300 populations that differed initially only at *STE4* and *WHI2*. We show that the**  
27 **presence of an overdominant mutation in *STE4* reduces, but does not eliminate,**  
28 **loss of heterozygosity at *WHI2*. By sequencing 40 evolved clones, we show that**  
29 **populations with linked overdominant and partially dominant mutations show less**  
30 **parallelism at the gene level, more varied evolutionary outcomes, and increased**  
31 **rates of aneuploidy. Our results show that the degree of dominance and the**  
32 **phasing of heterozygous beneficial mutations can constrain loss of heterozygosity**  
33 **along a chromosome arm, and that conflicts between partially dominant and**  
34 **overdominant mutations can affect evolutionary outcomes.**

35

36

37 **KEYWORDS**

38 Overdominance | Loss of Heterozygosity | Experimental Evolution | Yeast | Diploid

39

40 **SIGNIFICANCE STATEMENT**

41 In diploid populations, it is beneficial for partially dominant beneficial mutations to  
42 lose heterozygosity, but it is deleterious for overdominant beneficial mutations to do so.  
43 Because loss-of-heterozygosity tracts often encompass entire chromosome arms, a  
44 conflict will arise when a partially dominant beneficial mutation and an overdominant  
45 beneficial mutation exist in close proximity. We demonstrate that this conflict occurs, and  
46 that it restricts loss of heterozygosity, resulting in more variable evolutionary outcomes.

47

48 **INTRODUCTION**

49 The pace of adaptation in asexual diploids is strongly dependent on the dominance  
50 of new beneficial mutations. Theoretically, the probability of a given beneficial mutation  
51 fixing in a population is the product of its coefficient of selection ( $s$ ) and its degree of  
52 dominance ( $h$ ), where  $h = 0$  is fully recessive and  $h = 1$  is fully dominant (Orr and Otto  
53 1994). Beneficial alleles with a low degree of dominance ( $h \approx 0$ ) are unlikely to fix in  
54 asexual diploid populations, a phenomenon known as Haldane's Sieve (Haldane 1924,  
55 Connallon and Hall 2018). Depending on the degree of dominance, some adaptive  
56 pathways that are open to haploids, will be improbable or inaccessible to diploids.  
57 Changes to the spectrum of beneficial mutations and to the genetic targets of selection  
58 between haploid and diploid populations provide experimental evidence of this constraint  
59 (Fisher *et al.* 2018, Marad *et al.* 2018).

60 Recessive beneficial mutations can be converted to beneficial homozygous  
61 mutations through loss-of-heterozygosity (LOH) events during asexual propagation of  
62 diploid yeast populations (Gerstein *et al.* 2014). For highly heterozygous populations,  
63 such as inter-specific hybrids, LOH becomes the dominant mechanism of adaptation  
64 (Smukowski Heil *et al.* 2017, James *et al.* 2019) due to a high rate of LOH relative to point  
65 mutation (Barbera and Petes 2006, Lee *et al.* 2009) and to a reservoir of beneficial  
66 mutations that are masked in the heterozygous state. The ability of a given allele to  
67 escape Haldane's sieve by LOH will depend on its genomic location since the rate of LOH  
68 varies across the yeast genome (Lee *et al.* 2009). In natural isolates the rate of LOH  
69 increases with distance from the centromere (Peter *et al.* 2018) and in experimental  
70 evolution several hotspots for LOH have been identified, most strikingly at the rDNA locus  
71 on Chromosome XII (Fisher *et al.* 2018, Marad *et al.* 2018).

72 Two special cases of dominance further constrain adaptation in diploids.  
73 Underdominance ( $h < 0$ ) occurs when the heterozygote is less fit than either homozygous  
74 genotype. Underdominant mutations are unlikely to establish as heterozygotes and  
75 therefore underdominance impedes access to potentially adaptive homozygous  
76 genotypes. At the other extreme, overdominance ( $h > 0$ ) occurs when the heterozygote  
77 is more fit than either homozygous genotype. Overdominant mutations should readily  
78 establish in populations and be maintained as heterozygous by selection against  
79 homozygous genotypes (Fisher 1928). Because little is known about the distribution of  
80 the degree of dominance of new mutations in diploids, the relative importance of  
81 underdominant and overdominant mutations in genome evolution is unclear.  
82 Theoretically, overdominant mutations are predicted to be a major contributor to the

83 maintenance of genetic variation (Maruyama and Nei 1981), and a frequent, if perhaps  
84 only transient, outcome of diploid evolution (Manna *et al.* 2011, Sellis *et al.* 2011). Though  
85 genome-wide scans have turned up little evidence of overdominance (Szulkin *et al.* 2010,  
86 Hedrick 2012, Goudie *et al.* 2014), laboratory-evolution experiments demonstrate that  
87 overdominant mutations can contribute to short-term adaptation in diploid populations  
88 (Sellis *et al.* 2016, Leu *et al.* 2020).

89         If overdominant mutations are frequent in evolving asexual diploid populations,  
90 fitness conflicts may arise when overdominant ( $h > 0$ ) and partially dominant ( $0 < h < 1$ )  
91 heterozygous beneficial mutations arise in close proximity to one another on a  
92 chromosome. This is because an LOH event would convert both mutations to the  
93 homozygous state resulting in a fitness loss due to the overdominant mutation and a  
94 fitness gain due to the partially dominant mutation. We demonstrate that this conflict  
95 arises in experimental evolution between an overdominant mutation in *STE4* and a  
96 partially dominant mutation in *WHI2*, both of which are located on the right arm of  
97 Chromosome XV. We show experimentally that adaptive LOH at the *WHI2* locus is  
98 slowed by the presence of the overdominant *STE4* mutations.

99

## 100 **RESULTS**

101         We previously identified 20 genes that are targets of selection in 46 laboratory-  
102 evolved populations yeast that were propagated asexually for 4,000-generations (Fisher  
103 *et al.* 2018). By generation 1,000, all 46 populations had autodiploidized and therefore  
104 most adaptation occurred in the diploid state. Unlike true diploids (*MATa/α*), which do not  
105 mate, autodiploids (*MATa/a* or *MATα/α*) produce mating pheromones and will readily

106 mate with cells of the opposite mating type. Therefore, autodiploids, like haploids (*MATa*  
107 or *MAT $\alpha$* ), should benefit from mutations that inactivate the mating pathway (Lang *et al.*  
108 2009). However, only one mating pathway gene, *STE4*, is identified as a common target  
109 of selection across the 46 autodiploid populations (Fisher *et al.* 2018). In contrast,  
110 mutations in *STE4*, *STE5*, *STE11*, and *STE12* are overrepresented in 40 closely matched  
111 haploid populations (Lang *et al.* 2013). Though not identified in either experiment, *STE7*  
112 is also a target of selection in haploids (Lang *et al.* 2009, Buskirk *et al.* 2017). We have  
113 demonstrated previously that mating pathway mutations are loss-of-function based on a  
114 combination of their mutational spectra, allele reconstruction, and gene deletion (Lang *et*  
115 *al.* 2009, Lang *et al.* 2013, Buskirk *et al.* 2017). However, *STE4* mutations in autodiploids  
116 are inconsistent with simple loss-of-function: not only are they found in only one gene, but  
117 all six *STE4* mutations are heterozygous and cluster in a small (260 bp) region of the  
118 coding sequence ( $X^2(1, N=6) = 18.76, p < 10^{-4}$ , **Figure 1A**).

119 *STE4* encodes the highly conserved beta subunit of the heterotrimeric G protein  
120 complex. We mapped the positions of the evolved mutations onto the homology-predicted  
121 structure of Ste4p (**Figure S1**). All six autodiploid mutations impact residues near the C-  
122 terminal end of the protein, with three of these (a frameshift and two nonsense mutations)  
123 resulting in truncations of the final ~100 amino acids. Two missense mutations both occur  
124 in a putative random coil that derives from a yeast-specific insertion (Sondek *et al.* 1996).  
125 One synonymous mutation also arose in this region.

### 126 **Adaptive *STE4* mutations in autodiploids are either dominant or overdominant**

127 We hypothesized that the discrepancy between patterns of sequence evolution in  
128 haploids and autodiploids is because the beneficial mating pathway mutations in haploids

129 are recessive. We first tested whether the fitness benefit of evolved *ste4* mutations in  
130 autodiploids is phenocopied by gene deletion, as is the case with *ste4* mutations arising  
131 in haploid populations. We generated *STE4* deletion (*ste4* $\Delta$ ) strains as haploids, as  
132 heterozygous autodiploids, and as homozygous autodiploids. As reported previously, we  
133 find that *ste4* $\Delta$  mutants are beneficial in a haploid background (**Figure S2**). Similarly,  
134 homozygous *ste4* $\Delta$ /*ste4* $\Delta$  mutants are beneficial in *MATa/a* diploids (**Figure 1B**).  
135 Surprisingly, however, heterozygous *STE4/ste4* $\Delta$  mutants are underdominant:  
136 substantially less fit than the either homozygous genotype (**Figure 1C**).

137 The underdominance of *STE4* deletions confirms that evolved autodiploid mutations  
138 are not purely loss-of-function, as these would be deleterious. We used CRISPR-Cas9  
139 allele-swaps to reconstruct three autodiploid-evolved *ste4* alleles (one frameshift, one  
140 nonsense, and one missense mutation, **Figure 1A**). For each allele, we then assayed the  
141 fitness of the haploid mutant and the homozygous and heterozygous autodiploid mutants.  
142 In a haploid background the evolved frameshift and nonsense alleles have a fitness  
143 benefit ( $2.1 \pm 0.3\%$  and  $2.2 \pm 0.4\%$ , respectively; mean  $\pm$  standard error,  $p < 10^{-4}$  both  
144 genotypes) while the missense allele is neutral ( $-0.7 \pm 0.3\%$ ,  $p = 0.995$ , **Figure S2**; Note  
145 that we also verified that the synonymous PAM site mutation is neutral, **Figure S3**).

146 In the heterozygous autodiploids, like in the haploids, the *ste4*-S261fs and *ste4*-  
147 E315\* mutations are beneficial ( $0.8 \pm 0.2\%$  and  $1.2 \pm 0.1\%$ ,  $p = 0.02$  and  $p < 10^{-4}$ ,  
148 respectively), and the *ste4*-Arg312Gln mutation is neutral ( $0.2 \pm 0.2\%$ ,  $p = 0.49$ , **Figure**  
149 **1C**). The fitness effect of the heterozygous evolved alleles is ~40-50% of the fitness  
150 advantage conferred in haploids. Given that 95% of mutations in the autodiploids are  
151 heterozygous after 4,000 generations it is unsurprising that all six *STE4* mutations are

152 heterozygous, and we expected that the homozygous mutations would be equally (if not  
153 more) fit than the heterozygous *STE4* mutations. However, the *ste4-S261fs* and *ste4-*  
154 *E315\** homozygous mutants have fitness defects of  $-2.1 \pm 0.1\%$  and  $-2.4 \pm 0.1\%$ ,  
155 respectively (mean  $\pm$  standard error,  $p < 10^{-3}$  for both comparisons, **Figure 1C**). Therefore,  
156 rather than showing an additive fitness effects as predicted, two *STE4* missense  
157 mutations are overdominant ( $h > 1$ ).

### 158 **Linkage to overdominant *STE4* alleles delays, but does not prevent, adaptive LOH**

159 We next examined whether, in our populations, the presence of overdominant *ste4*  
160 mutations constrains adaptive LOH at linked loci. Although most mutations in our evolved  
161 autodiploids are heterozygous, there are two large genomic regions that are prone to high  
162 rates of loss-of-heterozygosity (LOH); these regions are identifiable based on the  
163 clustering of homozygous mutations in evolved genomes (Fisher *et al.* 2018). One of  
164 these regions on the right arm of Chromosome XV contains the *STE4* locus as well as  
165 three other common targets of selection in our experimental system: *WHI2*, *SFL1*, and  
166 *PDR5*. Unlike *STE4*, putative adaptive mutations in *WHI2*, *SFL1*, and *PDR5* are  
167 commonly observed to be homozygous in evolved clones. We show that an evolved  
168 mutation in *WHI2* (*whi2-Q29\**) is partially dominant, having a  $3.4 \pm 0.2\%$  benefit when  
169 heterozygous and a  $5.1 \pm 0.3\%$  benefit when homozygous (mean  $\pm$  standard error, **Figure**  
170 **2A**).

171 *WHI2*, *SFL1*, and *PDR5* are all centromere proximal to *STE4*, and since conversion  
172 tracts produced by mitotic recombination frequently extend from a medial breakpoint to  
173 the telomere, adaptive LOH of any of these three loci is likely to extend to through the  
174 *STE4* locus. We examined evolved autodiploid genotypes for evidence of LOH events



175 occurring after a *STE4* mutation arises on the right arm of Chromosome XV and we find  
176 none. There are two populations with fixed homozygous Chromosome XV mutations, but  
177 each contain heterozygous *STE4* alleles, indicating that the LOH event on Chromosome  
178 XV occurred before *STE4* mutations in these populations. The inverse—unfixed  
179 Chromosome XV homozygous mutations on a fixed *ste4* mutant background, which  
180 would indicate LOH on Chromosome XV after a mutation at *STE4*—is not observed in  
181 any of the three populations with fixed *STE4* mutations (**Figure S4**).

182 To explicitly test the hypothesis that overdominant *STE4* alleles decrease the  
183 likelihood of adaptive LOH at linked loci, we performed an evolution experiment using  
184 three strains that differed only on the right arm of Chromosome XV (**Figure 2B**). One  
185 strain contained a heterozygous beneficial and partially dominant *whi2*-Q29\* mutation  
186 and was wild-type at the *STE4* locus (*WHI2/whi2*-Q29\*, *STE4/STE4*). A second strain  
187 contained the same heterozygous *whi2*-Q29\* mutation in *cis* with an a heterozygous  
188 overdominant *ste4*-E315\* mutation (*WHI2/whi2*-Q29\*, *STE4/ste4*-E315\*). A control strain  
189 was wild type at both loci.

190 We evolved 96 replicate populations of each strain (95 for control strain) for 1,000  
191 generations. We tested for LOH events at the *WHI2* locus every 100 generations starting  
192 at Generation 400. All three strains carried KanMX and HphMX drug-resistance cassettes  
193 tightly linked to the *WHI2* loci on each chromosome. By assaying for loss of the ability to  
194 grow on double drug (G418+Hygromycin), our assay is sensitive to LOH events that reach  
195 frequency of 0.5 in the population (**Figure S5**).

196 The presence of a heterozygous and partially dominant *whi2*-Q29\* adaptive  
197 mutation drives a high rate of fixation of LOH events relative to the wild-type control

198 populations (**Figure 2C**). However, among populations with a *whi2*-Q29\* allele, the  
199 fraction of populations experiencing LOH is significantly lower in populations with a  
200 telomeric overdominant *ste4*-E315\* mutation at Generation 420 (Fisher's exact,  $p=0.001$ ,  
201 **Figure 2C**) and remains lower through all time points assayed, although this becomes  
202 non-significant at Generations 900 and 1,000 (Fisher's exact,  $p=0.066$ ,  $0.077$ ). While  
203 time-course LOH dynamics show an effect of linkage to an overdominant allele, the  
204 linkage did not prevent LOH at *WHI2*, as would be predicted by the additive fitness effects  
205 of both homozygous mutations (**Figures 1C and 2B**).

206         Although both the *WHI2* and *STE4* loci are on the right arm of Chromosome XV,  
207 they are 700 kb apart. We hypothesized that LOH events that occurred in populations  
208 with both *WHI2/whi2*-Q29\* and *STE4/ste4*-E315\* heterozygosities might involve short  
209 tracts of mitotic recombination that included the *WHI2* locus but not the *STE4* locus. We  
210 sequenced the *STE4* locus in all fifteen linked populations that had fixed a *whi2*-Q29\*  
211 allele. In only two populations did the *ste4*-E315\* remain heterozygous. In the other  
212 thirteen populations both the partially dominant *whi2*-Q29\* mutation and the  
213 overdominant *ste4*-E315\* mutation remained homozygous (**Figure S6**).

#### 214 **LOH of *ste4*-E315\* cannot be explained by compensatory mutations**

215         Two possibilities could explain the observed LOH of *ste4*-E315\*: either mutations at  
216 other loci on the right arm of Chromosome XV changed the net fitness effect of LOH or  
217 mutations elsewhere in the genome altered the fitness effect or the degree of dominance  
218 of either the *ste4*-E315\* or the *whi2*-Q29\* mutation. To test these possibilities we  
219 performed whole genome sequencing on two clones each from 20 populations: seven  
220 that lost heterozygosity at both loci (*whi2*-Q29\*/*whi2*-Q29\*, *ste4*-E315\*/*ste4*-E315\*), two

221 that lost heterozygosity at *WHI2* but not *STE4* in *ste4*-E315\* linked populations (*whi2*-  
222 Q29\*/*whi2*-Q29\*, *STE4*/*ste4*-E315\*), nine that lost heterozygosity in a *STE4* wild-type  
223 background (*whi2*-Q29\*/*whi2*-Q29\*), and two control populations that are wild-type at  
224 both loci (**Figure S6**). We identified 914 nuclear mutations normally distributed across the  
225 40 clones (**Supplemental Dataset 1**, Shapiro-Wilk test,  $p=0.36$ ) with a mean of 30.7  
226 mutations per clone. Twelve mutations were homozygous (not including *WHI2* or *STE4*  
227 alleles).

228 To identify putative *de novo* driver mutations on Chromosome XV that could  
229 explain the repeated occurrence of what should be a deleterious LOH event, we looked  
230 for homozygous nonsynonymous mutations on the right arm of Chromosome XV that are  
231 found in both clones (and thus were likely present before the LOH event). Of the 914  
232 mutations, none meet these criteria, thus ruling out *de novo* evolution of linked beneficial  
233 mutations as an explanation for the repeated LOH of a the overdominant *ste4*-E315\*  
234 mutation.

235 Next we looked for possible epistatic modifiers of *STE4*. Ninety-six genes either  
236 share Gene Ontology terms with *STE4* or are known physical and/or genetic interactors  
237 with *STE4* (**Table S1**). One of the of seven populations that lost heterozygosity of *ste4*-  
238 E315\* acquired heterozygous missense mutations in two of these genes, *STE7* and  
239 *PTC2*. None of the other sequenced populations contained mutations in any of these 96  
240 genes. We also took an unbiased approach by searching for genes that were mutated in  
241 more than one of the populations that lost heterozygosity of *ste4*-E315\*. However, of the  
242 101 genes containing fixed (present in both sequenced clones) nonsynonymous  
243 mutations across the 9 populations carrying an overdominant *STE4* allele, none were

244 mutated in more than one population. In contrast, 5 of 93 genes accruing nonsynonymous  
245 fixed mutations in unlinked populations are mutated in multiple populations. Unlinked  
246 populations are significantly enriched for multi-hit genes in this comparison (Fisher's  
247 exact,  $p=0.02$ ).

248 New point mutations cannot account for LOH in all populations. To explore other  
249 possible mechanisms of modifying or escaping the overdominance of *ste4-E315\** we  
250 looked for evidence of structural evolution in our sequenced populations. First, we verified  
251 that Chromosome XV read depth in all clones is consistent with genome-wide coverage  
252 (**Figure 3A**), indicating that LOH events were due to mitotic recombination and not  
253 chromosome loss. We next identified aneuploidies and copy number variants (CNVs) in  
254 each clone. We find three different chromosomal aneuploidies across 6 populations, 5 of  
255 which were initiated with a *ste4-E315\** mutation and one of which was a control population  
256 (**Figure 3A**). Among the *ste4-E315\** populations, trisomy-VIII and trisomy-X were found  
257 in individual clones of 2 populations that lost heterozygosity at both loci. While  
258 Chromosome III aneuploidies were found in three *ste4-E315\** populations, only two of  
259 these populations lost heterozygosity at both *whi2-Q29\** and *ste4-E315\** and one lost  
260 heterozygosity at *whi2-Q29\** but retained heterozygosity at *ste4-E315\** (**Figure 3A**). We  
261 also identified two large CNVs on Chromosome III (**Table S2, Figure S7**). An  
262 amplification of 93kb on the right arm of Chromosome III, is found in both clones of a *ste4-*  
263 *E315\**-containing population in conjunction with a Chromosome III trisomy (**Figure 3A**).  
264 The other CNV, a 16kb deletion on the right arm of Chromosome III, was detected in a  
265 wild-type *STE4* population that lost heterozygosity at *WHI2-Q29\**.

266           There are no clear structural events shared by all populations that experienced  
267 LOH at an overdominant *STE4* allele. Chromosome III is an apparent hotspot of structural  
268 evolution in this experiment – however, most populations that underwent LOH at an  
269 overdominant locus did not contain any Chromosome III copy number variations and one  
270 of the populations that did experience Chromosome III trisomy did not lose heterozygosity  
271 at *ste4*-E315\*. Consequently, we cannot attribute LOH to Chromosome III copy number  
272 variation. Nonetheless, populations carrying both *whi2*-Q29\* and *ste4*-E315\* alleles were  
273 enriched for aneuploidies (Fisher’s Exact,  $p=0.03$ ) relative to populations with only a *whi2*-  
274 Q29\* allele, which were all found to be euploid and had no detectable CNVs.

275 **Populations carrying linked dominant and overdominant beneficial mutations**  
276 **show a broad range of evolutionary outcomes**

277           Taken together, we find that *ste4*-E315\* *whi2*-Q29\* populations are significantly  
278 depleted for recurrently mutated genes and significantly enriched for aneuploidies, a  
279 standard signature of parallel evolution. This implies that populations seeded with an  
280 overdominant mutation telomeric to a partially dominant beneficial mutation may  
281 experience a greater range of possible evolutionary outcomes. To explore this further, we  
282 aggregated all 487 mutations to coding sequences (excluding synonymous mutations)  
283 across all populations to identify targets of adaptive mutations using a recurrence-based  
284 statistical method (**Supplemental Dataset 2**). We found that only 5 of 21 mutations to 7  
285 adaptive targets occurred in populations seeded with overdominant alleles. Since 9 of the  
286 20 sequenced populations carried an overdominant *STE4* mutation, our null expectation  
287 would be that about half of driver mutations would be found in *ste4*-E315\* populations.  
288 Instead, we find these populations to exhibit less parallelism at the gene level. We looked

289 more closely at differences in parallelism in the set of 487 moderate to high effect coding  
290 sequence mutations by calculating the Jaccard Index ( $J$ ) for all pairwise combinations of  
291 populations. The distribution of  $J$  is significantly left shifted in comparisons between *ste4-*  
292 *E315\*-whi2-Q29\** populations relative to comparisons between *STE4-whi2-Q29\**  
293 populations (Wilcoxon rank-sum,  $W_{linked}$  =402,  $W_{unlinked}$  =894,  $p < 0.001$ ). Populations of  
294 both genotypes did not significantly differ in the total number of mutations accrued  
295 ( $t(15.734) = -1.68$ ,  $p = 0.112$ , **Figure S8**). However, because populations lacking an  
296 overdominant *STE4* mutation tended to accrue slightly more mutations ( $49.4 \pm 12.8$ ) than  
297 those carrying *ste4-E315\** ( $39.9 \pm 11.2$ ), we used a multiple regression to show that  
298 starting genotype ( $p = 0.008$ ), but not number of mutations ( $p = 0.211$ ), is a significant  
299 predictor of  $J$  ( $F(2,69) = 3.89$ ,  $p = 0.025$ ). Therefore, we find genotypes with an  
300 overdominant *STE4* allele to be evolving more divergently at the sequence level than  
301 genotypes that are otherwise identical but lack an overdominant *STE4* allele.

302

## 303 **DISCUSSION**

304 Most beneficial mutations that arise in asexually evolving diploid populations are  
305 heterozygous and are at least partially dominant. Here we show that the degree of  
306 dominance can constrain adaptive evolution at linked loci. Mechanistically these  
307 constraints arise due to conflicting effects that LOH has on partially-dominant and  
308 overdominant beneficial mutations. Given that LOH conversion tracts frequently extend  
309 the full length of a chromosome arm, the linked effects we observe on Chr XV will hold  
310 true for all chromosomes in asexually evolving diploid populations, particularly in the early  
311 stages of adaptation when overdominant beneficial mutations will be most frequent

312 (Manna *et al.* 2011, Sellis *et al.* 2011). The strength of the linked effects, however, will  
313 vary depending on local rates of mitotic recombination and the length of repair tracts as  
314 well as the distribution of mutational effects on fitness—and the degree of dominance of  
315 those mutations—along a chromosome. Comprehensive analyses of the gene deletions  
316 in yeast reveal few underdominant or overdominant deletions (Agrawal and Whitlock),  
317 however, this may not be indicative of the distribution of dominance non-loss of function  
318 mutations. Indeed, in our evolution experiments we observe examples of overdominant,  
319 underdominant, and recessive beneficial mutations in *STE4*.

320 Most theory addressing mutational dominance and constraint focuses on the  
321 consequences of recessiveness, namely the constraints imposed by Haldane's sieve  
322 (Charlesworth and Charlesworth 1999, Orr and Betancourt 2001) and the load imposed  
323 by recessive deleterious mutations (Charlesworth and Charlesworth 1999, Chasnov  
324 2000). Underdominance is most frequently invoked as a cause of reproductive isolation  
325 (Barton and De Cara 2009), but our findings suggest an underappreciated role as an  
326 evolutionary constraint. For example, though a homozygous deletion of *STE4* would be  
327 beneficial in a *MATa/a* strain, this mutation is underdominant and would be able to fix only  
328 in extremely small or fragmented populations (Newberry *et al.* 2016).

329 Two of the evolved *STE4* mutations we identified demonstrate a strong degree of  
330 overdominance when engineered into an ancestral background. Recent theoretical  
331 examination of adaptation in diploids has renewed interest in the significance of  
332 overdominant mutations in adaptation and suggested overdominant polymorphisms may  
333 be a frequent mode of adaptation (Manna *et al.* 2011, Sellis *et al.* 2011). These models  
334 find that when selection on a trait is stabilizing, strong effect heterozygous mutations that



335 overshoot the fitness optimum as homozygotes should be somewhat common.  
336 Experimental evolution provides a way to empirically test this prediction. The few  
337 examples of overdominance arising *de novo* in laboratory evolution include amplifications  
338 of glucose transporter genes in glucose-limited chemostat populations (Sellis *et al.* 2016).  
339 Overdominance of a copy number variant is well explained by an “overshoot” of an optimal  
340 gene copy number, and hexose transporter amplifications have been previously shown  
341 to exhibit sign epistasis with mutations that upregulate their expression.

342 Mitotic recombination resulting in loss-of-heterozygosity (LOH) is a common and  
343 important mechanism of adaptation in laboratory evolving diploid yeast (Gerstein *et al.*  
344 2014, Smukowski Heil *et al.* 2017, Fisher *et al.* 2018, James *et al.* 2019). Most of these  
345 reported instances of LOH in asexual yeast adaptation involve a large conversion tract  
346 that runs from the break point to the telomere. This means that there is effective linkage  
347 between loci that are kilobases apart. Overdominant beneficial mutations will therefore  
348 impose constraint on mitotic recombination along the full length of a chromosome arm.  
349 We tested this using a partially dominant beneficial mutation 700 kb upstream of *STE4* in  
350 the *WHI2* gene to examine how LOH dynamics differ between genotypes with only a  
351 *WHI2* mutation and those with a *WHI2* mutation linked to an overdominant *STE4* allele.  
352 In order to lose heterozygosity and gain a fitness benefit at *WHI2*, linked populations that  
353 must either lose heterozygosity at the *WHI2* locus while maintaining heterozygosity at the  
354 distal *STE4* locus or suffer the fitness cost loss of gene-converting an overdominant *STE4*  
355 locus. This is the first evolution experiment to directly measure rates of LOH when the  
356 conversion of a linked locus is unfavorable. We find a significant initial obstructive effect  
357 of overdominant mutations on the rate of adaptive LOH at linked loci. After the first few



358 hundred generations, however, this effect is weakened and LOH is repeatedly observed  
359 in populations bearing an overdominant *STE4* allele.

360         Given the individual fitness effects of *whi2*-Q28\* and *ste4*-Q315\* alleles, we  
361 expected fewer populations to lose heterozygosity on Chromosome XV when both  
362 mutations were present on the same chromosome. We found, however, that linked  
363 populations still adapted by way of LOH at *WHI2*, but the appearance of these events  
364 was delayed by several hundred generations (because we were only able to detect LOH  
365 when homozygous genotypes were above 50% and could not observe initial appearance  
366 of these homozygotes in the populations). One possible explanation is that *de novo*  
367 mutations arose during this time that changed the net fitness effect of LOH. Whole  
368 genome sequencing revealed that, while modifying mutations may occur, they cannot be  
369 the sole explanation for the LOH we observe in the linked populations. We do observe an  
370 enrichment for aneuploidies in the linked populations, though the specific changes we  
371 found (gains of additional copies of Chromosomes III and VIII) have been observed before  
372 (Fisher *et al.* 2018).

373         Analysis of genome sequence evolution in 20 sequenced clones shows that  
374 unlinked *whi2*-Q28\* populations accrue more mutations in common targets of selection,  
375 whereas *whi2*-Q28\*/*ste4*-Q315\* linked populations show a wider range of evolutionary  
376 outcomes at the genome sequence level. The difference in the modes of adaptation  
377 between two nearly identical genomes (differing only by a single heterozygous mutation),  
378 indicate that small changes in the genome can introduce constraints on genome evolution  
379 and influence evolutionary outcomes.

380

## 381 **METHODS**

### 382 **Analysis of evolved mutations in *STE4***

383 We previously identified *STE4* mutations from whole-genome sequencing data  
384 reported for 40 haploid (Lang *et al.* 2013) and 46 autodiploid (Fisher *et al.* 2018) yeast  
385 populations. The mutational target window of *STE4* (in bp) was calculated for both  
386 haploids and autodiploids. The probability of all mutations occurring in the observed  
387 window was calculated separately for haploids and autodiploids using a one-sample  
388 proportions test.

389 Homology modeling of Ste4p was performed automatically on the SWISS-MODEL  
390 web server to visualize the positions of mutated residues. The best scoring model was  
391 based on the structure of G protein subunit beta (Gnb1) from *Rattus norvegicus* (41.96%  
392 identity, 0.63 GMQE, -3.31 QMEAN, PDB ID: 6CMO). Visualization of the Ste4p model  
393 was done in PyMOL Molecular Graphics System, version 2.3.0. This structure does not  
394 contain a 33 amino acid yeast-specific insertion.

### 395 **Construction of evolved mutation and *STE4* deletion strains**

396 Strains used in this paper are described in **Table S3**. Reconstruction experiments  
397 were performed in the same W303 ancestral background (yGIL432; *MATa*,  
398 *ura3Δ::pFUS1-yEVENus*, *ade2-1*, *his3-11,15*, *leu2-3,112*, *trp1-1*, *CAN1*, *bar1Δ::ADE2*,  
399 *hmlaΔ::LEU2*, *GPA1::NatMX*). Briefly, deletion strains were generated by integrating the  
400 *ste4Δ::KanMX* locus from the deletion collection. Crosses of strains carrying null alleles  
401 were performed by first transforming with a *STE4*-expressing plasmid from the MoBY  
402 ORF plasmid collection to complement *ste4Δ*. Three evolved *STE4* alleles were selected  
403 for reconstruction, 81ΔT (S261fs), G943T (E315\*), and G935A (R312Q). Alleles were

404 reconstructed in yGIL432 using CRISPR-Cas9 alleles swaps. We constructed constitutive  
405 Cas9-expressing plasmids starting from pML104 (Addgene 67638) expressing a *STE4*-  
406 specific guide RNAs (5' CTACCCCTAC TTATATGGCA 3') and co-transformed the  
407 plasmid along with a 500 bp linear repair template (gBlock, IDT) encoding the one of three  
408 evolved alleles as well as a synonymous C954A PAM site substitution. A strain containing  
409 just the synonymous PAM site was also isolated to verify neutrality (**Figure S3**). To  
410 minimize variation due to transformation and Cas9 activity, one successful transformant  
411 per allele was backcrossed twice and the resulting diploid was sporulated and tetrad  
412 dissected. For each allele, spores were genotyped at *STE4* and intercrossed to generate  
413 heterozygous and homozygous mutants. Crosses of strains carrying evolved *ste4* alleles  
414 were performed by first transforming with a plasmid from the MoBY ORF plasmid  
415 collection to compliment *STE4*. Mutants carrying an evolved *whi2*-C85T (Q29\*) allele  
416 were generated in identical fashion with two exceptions. The evolved substitution is within  
417 the *WHI2* gRNA used (5' ACAGTACGAA GGTAACGAGG 3'), and therefore no  
418 synonymous mutation was introduced to eliminate Cas9 activity. A correct *whi2*-Q29\* was  
419 backcrossed once and intercrossed to produce homozygotes and heterozygotes. All  
420 diploid genotypes were converted to *MATa/a* as described above. We also generated  
421 strains containing dominant drug cassettes tightly linked to the *WHI2* locus using  
422 CRISPR. We inserted either HphMX or KanMX 220 bp downstream of *WHI2* or *whi2*-  
423 Q29\* by transforming with the same gRNA (5' ATCCCCTTCT GCAAATAACG 3') and  
424 Cas9-expressing plasmid and co-transforming with linear drug cassettes flanked by 40  
425 bp of homology to the targeted region. Successful transformants were then backcrossed  
426 to either a wild-type background or a *ste4*-G943T (described above) mutant. Crosses

427 were sporulated and spores were selected in which drug-marker tagged mutant and wild-  
428 type *WHI2* alleles are present on the same chromosome as both mutant and wild-type  
429 *STE4*. Correct spores were crossed to generate three genotypes:  
430 *WHI2::HphMX/WHI2::KanMx STE4/STE4*, *WHI2::HphMX/whi2-Q29\*::KanMx*  
431 *STE4/ste4-E315\**, and *WHI2::HphMX/whi2-Q29\*::KanMx ste4-E315\*/STE4*. All three  
432 genotypes were converted to *MATa/a* as described above. Eight replicate *MATa/a*  
433 colonies were picked for each mating-type conversion to be used for downstream  
434 analysis.

### 435 **Fitness assays**

436 We measured the effects of complete gene deletions and evolved *STE4* mutations  
437 on fitness using competitive fitness assays as previously reported (Buskirk *et al.* 2017).  
438 Briefly, query cultures were mixed 1:1 with a ploidy and mating-type matched  
439 fluorescently labeled ancestral strain. Co-cultures were propagated in a 96-well plate in  
440 an identical to the evolution experiment in in which the variants arose for 50 generations.  
441 Saturated cultures were sampled for flow cytometry at ten-generation intervals. Flow  
442 cytometry data was analyzed with FlowJo 10.3. Selective coefficients were calculated as  
443 the slope of the best-fit line of the natural log of the ratio between query and reference  
444 strains against time.

445 Two technical replicates each of eight biological replicates were averaged for  
446 analysis of all *MATa/a* genotypes and all deletion mutants. Evolved mutations in a haploid  
447 background were averaged from four technical replicates of a single clone. Fitness data  
448 for haploid and diploid genotypes were analyzed independently using a one-way analysis

449 of variance ANOVA. Post hoc comparisons using the Tukey test were carried out to  
450 identify genotypes with significantly different fitness than wild-type controls.

### 451 **Short-term evolution experiment**

452 We examined the effect of evolved *ste4* alleles on likelihood of loss-of-  
453 heterozygosity (LOH) at a linked locus, *WHI2*. We first validated the homozygous and  
454 heterozygous fitness benefits of an evolved allele, *whi2*-C85T (Q29\*), via mutant  
455 reconstruction and fitness assays as described above. We then generated strains  
456 containing dominant drug cassettes tightly linked to the *WHI2* locus to investigate the  
457 effect of *STE4* linkage on loss of heterozygosity along the right arm of Chromosome XV  
458 (Supplementary methods).

459 Three strains (*WHI2*::HphMX/*WHI2*::KanMx *STE4/STE4*, *WHI2*::HphMX/*whi2*-  
460 Q29\*::KanMx *STE4/ste4*-E315\*, and *WHI2*::HphMX/*whi2*-Q29\*::KanMx *ste4*-  
461 E315\*/*STE4*) were grown in 10 ml overnight cultures in YPD with 0.4 mg/ml G418 and  
462 0.6 mg/ml Hygromycin B. Saturated cultures were diluted 1:1,000 to initiate 287 128  $\mu$ l  
463 cultures across three 96-well plates. Plates were incubated unshaken at 30°C and  
464 propagated daily in an identical fashion to the original evolution experiment in which the  
465 mutations arose (Lang *et al.* 2013). After 500 generations heterozygosity was assayed by  
466 spotting 2  $\mu$ l (~5,000 cells) to double drug plates (YPD with 0.4 mg/ml G418, 0.6 mg/ml  
467 Hygromycin B) and to both single drug agar plates. Plates were inspected for speckled  
468 spots (indicating homozygous genotypes in  $\geq 50\%$  the population) and absence of growth  
469 (indicating LOH sweeps). We compared the number of populations with evidence of LOH  
470 polymorphism or sweeps between genotypes using a Fisher's exact test with a Bonferroni  
471 correction for multiple comparisons.

## 472 **Whole genome sequencing and analysis**

473           We sequenced nine of fifteen linked populations and nine of twenty-seven unlinked  
474 populations in which a homozygous *WHI2* allele genotype fixed. The nine populations for  
475 each group were chosen to be representative of the spectrum of dynamics observed in  
476 the evolution experiment (i.e. some populations that underwent LOH early in the  
477 experiment and some that underwent LOH late). Each population was struck to singles  
478 on YPD to obtain two clones for sequencing. Clones were grown overnight in 5 ml YPD  
479 and then frozen as cell pellets at -20°C. Genomic DNA was isolated from frozen pellets  
480 via phenol-chloroform extraction and ethanol precipitation. Total genomic DNA was used  
481 in a Nextera library preparation as described previously (Buskirk *et al.* 2017). All  
482 individually barcoded clones were pooled and paired-end sequenced on NovaSeq 6000  
483 sequencer at the Genomics Core Facility at the Lewis-Sigler Institute for Integrative  
484 Genomics, Princeton University.

485           Raw sequence data were concatenated and then demultiplexed using a custom  
486 python script from L. Parsons (Princeton University). Adapter sequences were removed  
487 using Trimmomatic (Bolger *et al.* 2014). Reads were then aligned to a customized W303  
488 genome using BWA v. 0.7.7 (Li and Durbin 2009) and variants were called using  
489 FreeBayes v0.9.21-24-381. VCFtools was used to filter variants common to all genomes.  
490 Remaining mutations were annotated using a strain-background customized annotation  
491 file (Matheson *et al.* 2017). All putative evolved mutations were confirmed manually using  
492 IGV (Thorvaldsdóttir *et al.* 2013).

493           Each genome was independently examined for structural variants using Samtools  
494 depth (Li *et al.* 2009). Aneuploidies were detected by dividing median chromosome

495 coverage by median genome-wide coverage for each chromosome. CNVs were similarly  
496 detected using a sliding 1 kb window across each chromosome. Putative CNVs identified  
497 were confirmed by visual inspection of chromosome coverage plots.

498 A list of 92 candidate genes for the modification of overdominance at *STE4* was  
499 curated by concatenating a list of all known *STE4* interactors and all genes annotated to  
500 the GO term “pheromone dependent signal transduction involved in conjugation with  
501 cellular fusion” and all genes annotated to children of this GO term. The above GO term  
502 was selected out of the seventeen terms assigned to *STE4* because changes to  
503 pheromone-induced signaling is thought to be the cellular basis of the fitness effect of  
504 *STE4* mutations (Lang *et al.* 2009). These searches were performed in YeastMine  
505 (Balakrishnan *et al.* 2012).

#### 506 **Identification of genic targets of selection and quantification of parallelism**

507 To identify parallel targets of selection we first removed all non-protein coding and  
508 synonymous mutations to improve our signal. We then identified parallel targets of  
509 selection as described previously (Fisher *et al.* 2018). Briefly, we calculate the expected  
510 number of mutations for each gene,  $\sigma$ , using the Poisson distribution weighted by the  
511 length ( $L$ ) of the gene in base-pairs:

$$512 \quad (1) \quad \lambda_{\sigma} = \left( \frac{L_{\sigma}}{\sum_{\sigma}^N L_{\sigma}} \right) M$$

513 where  $M$  is the total number of coding sequence mutations in the dataset. The probability  
514 of observing  $k$  mutations in gene  $\sigma$  is therefore

$$515 \quad (2) \quad P\{obs = k\} = \frac{\lambda_{\sigma}^k}{k!} e^{-\lambda_{\sigma}}$$

516 We use expression (2) to calculate the  $p$ -value for the observed number of mutations in  
517 each gene. We then applied a Benjamin-Hochberg post hoc adjustment to correct for  
518 multiple hypothesis testing.

519 Parallelism was quantified using the Jaccard Index (Bailey *et al.* 2015), which  
520 calculates the similarity between two sets of mutated genes by quantifying the overlap of  
521 their union. Again, non-protein coding and synonymous mutations were excluded to  
522 increase the signal of adaptive parallelism. A value of  $J$  was calculated for pairwise  
523 combinations of populations. The distribution of  $J$  for all pairs of linked populations was  
524 compared to the distribution of  $J$  for all pairs of unlinked populations using a Wilcoxon  
525 rank-sum test with continuity correction.

## 526 **Statistical analyses**

527 All statistical analyses reported were performed using tools in the R Stats package  
528 in R v.3.6.2. All plots were produced in R using the ggplot2 package (Wickham 2016)  
529 except Figures S5 and S7 which were produced using base R plotting.

530

## 531 **ACKNOWLEDGEMENTS**

532 We thank members of the Lang Lab for comments on this manuscript. This work was  
533 supported by the National Institutes of Health Grant 1R01GM127420 [G.I.L.]. K.J.F. is a  
534 Morgridge Metabolism Interdisciplinary Fellow of the Morgridge Institute for Research.

535

## 536 **COMPETING INTERESTS**

537 The authors have no competing interests to declare.

538



539 **AUTHOR CONTRIBUTIONS**

540 K.J.F. and G.I.L. conceived of the project and designed experiments. K.J.F. and R.C.V.  
541 performed experiments. K.J.F. and R.C.V. analyzed the data. K.J.F. and G.I.L. wrote the  
542 manuscript.

543

544 **DATA AVAILABILITY**

545 The raw short-read sequencing data reported in this paper have been deposited in the  
546 NCBI BioProject database (accession no. PRJNA634573).

547

548 **REFERENCES**

549 Agrawal, A. F. and M. C. Whitlock Inferences about the distribution of dominance drawn  
550 from yeast gene knockout data. *Genetics Soc America*.

551 Bailey, S. F., N. Rodrigue, R. K. b. a. Evolution and Undefined (2015). The effect of  
552 selection environment on the probability of parallel evolution. *Molecular biology and*  
553 *evolution* **32**(6): 1436-1448.

554 Balakrishnan, R., J. Park, K. Karra, B. C. Hitz, G. Binkley, E. L. Hong, J. Sullivan, G.  
555 Micklem and J. Michael Cherry (2012). Yeastmine—an integrated data warehouse for  
556 *saccharomyces cerevisiae* data as a multipurpose tool-kit. *Database* **2012**.

557 Barbera, M. A. and T. D. Petes (2006). Selection and analysis of spontaneous reciprocal  
558 mitotic cross-overs in *saccharomyces cerevisiae*. *Proceedings of the National Academy*  
559 *of Sciences* **103**(34): 12819-12824.

560 Barton, N. H. and M. A. R. De Cara (2009). The evolution of strong reproductive isolation.  
561 *Evolution* **63**(5): 1171-1190.

562 Bolger, A. M., M. Lohse and B. Usadel (2014). Trimmomatic: A flexible trimmer for illumina  
563 sequence data. *Bioinformatics* **30**(15): 2114-2120.

564 Buskirk, S. W., R. E. Peace and G. I. Lang (2017). Hitchhiking and epistasis give rise to  
565 cohort dynamics in adapting populations. *National Acad Sciences* **114**(31).

566 Charlesworth, B. and D. Charlesworth (1999). The genetic basis of inbreeding  
567 depression. *Genetical Research* **74**(3): 329-340.

568 Chasnov, J. R. (2000). Mutation-selection balance, dominance and the maintenance of  
569 sex.

570 Connallon, T. and M. D. Hall (2018). Genetic constraints on adaptation: A theoretical  
571 primer for the genomics era, Blackwell Publishing Inc. **1422**: 65-87.

- 572 Fisher, K. J., S. W. Buskirk, R. C. Vignogna, D. A. Marad and G. I. Lang (2018). Adaptive  
573 genome duplication affects patterns of molecular evolution in *saccharomyces cerevisiae*.  
574 *PLoS genetics* **14**(5): e1007396-e1007396.
- 575 Fisher, R. A. (1928). The possible modification of the response of the wild type to  
576 recurrent mutations. *The American Naturalist* **62**(679): 115-126.
- 577 Gerstein, A. C., A. Kuzmin and S. P. Otto (2014). Loss-of-heterozygosity facilitates  
578 passage through haldane's sieve for *saccharomyces cerevisiae* undergoing adaptation.  
579 *Nature communications* **5**(1): 1-9.
- 580 Goudie, F., M. H. Allsopp and B. P. Oldroyd (2014). Selection on overdominant genes  
581 maintains heterozygosity along multiple chromosomes in a clonal lineage of honey bee.  
582 *Evolution* **68**(1): 125-136.
- 583 Haldane, J. B. S. (1924). A mathematical theory of natural and artificial selection. Part ii  
584 the influence of partial self-fertilisation, inbreeding, assortative mating, and selective  
585 fertilisation on the composition of mendelian populations, and on natural selection.  
586 *Biological Reviews* **1**(3): 158-163.
- 587 Hedrick, P. W. (2012). What is the evidence for heterozygote advantage selection?  
588 *Trends in ecology & evolution* **27**(12): 698-704.
- 589 James, T. Y., L. A. Michelotti, A. D. Glasco, R. A. Clemons, R. A. Powers, E. S. James,  
590 D. Rabern Simmons, F. Bai and S. Ge (2019). Adaptation by loss of heterozygosity in  
591 *saccharomyces cerevisiae* clones under divergent selection. *Genetics* **213**(2): 665-683.
- 592 Lang, G. I., A. W. Murray and D. Botstein (2009). The cost of gene expression underlies  
593 a fitness trade-off in yeast. *Proceedings of the National Academy of Sciences* **106**(14):  
594 5755-5760.
- 595 Lang, G. I., D. P. Rice, M. J. Hickman, E. Sodergren, G. M. Weinstock, D. Botstein and  
596 M. M. Desai (2013). Pervasive genetic hitchhiking and clonal interference in forty evolving  
597 yeast populations. *Nature* **500**(7464): 571-574.
- 598 Lee, P. S., P. W. Greenwell, M. Dominska, M. Gawel, M. Hamilton and T. D. Petes (2009).  
599 A fine-structure map of spontaneous mitotic crossovers in the yeast *saccharomyces*  
600 *cerevisiae*. *PLoS Genet* **5**(3): e1000410-e1000410.
- 601 Leu, J. Y., S. L. Chang, J. C. Chao, L. C. Woods and M. J. McDonald (2020). Sex alters  
602 molecular evolution in diploid experimental populations of *s. Cerevisiae*. *Nature Ecology*  
603 *and Evolution* **4**(3): 453-460.
- 604 Li, H. and R. Durbin (2009). Fast and accurate short read alignment with burrows-wheeler  
605 transform. *Bioinformatics* **25**(14): 1754-1760.
- 606 Li, H., B. Handsaker, A. Wysoker, T. Fennell, J. Ruan, N. Homer, G. Marth, G. Abecasis  
607 and R. Durbin (2009). The sequence alignment/map format and samtools. *Bioinformatics*  
608 **25**(16): 2078-2079.
- 609 Manna, F., G. Martin and T. Lenormand (2011). Fitness landscapes: An alternative theory  
610 for the dominance of mutation. *Genetics Soc America*.

- 611 Marad, D. A., S. W. Buskirk and G. I. Lang (2018). Altered access to beneficial mutations  
612 slows adaptation and biases fixed mutations in diploids. *Nature ecology & evolution* **2**(5):  
613 882-889.
- 614 Maruyama, T. and M. Nei (1981). Genetic variability maintained by mutation and  
615 overdominant selection in finite populations. *Genetics* **98**(2): 441-459.
- 616 Matheson, K., L. Parsons and A. Gammie (2017). Whole-genome sequence and variant  
617 analysis of w303, a widely-used strain of *saccharomyces cerevisiae*. *G3: Genes,*  
618 *Genomes, Genetics* **7**(7): 2219-2226.
- 619 Newberry, M. G., D. M. McCandlish and J. B. Plotkin (2016). Assortative mating can  
620 impede or facilitate fixation of underdominant alleles. *Theoretical Population Biology* **112**:  
621 14-21.
- 622 Orr, H. A. and A. J. Betancourt (2001). Haldane's sieve and adaptation from the standing  
623 genetic variation. *Genetics* **157**(2): 875-884.
- 624 Orr, H. A. and S. P. Otto (1994). Does diploidy increase the rate of adaptation? *Genetics*  
625 **136**(4): 1475-1480.
- 626 Peter, J., M. De Chiara, A. Friedrich, J.-X. Yue, D. Pflieger, A. Bergström, A. Sigwalt, B.  
627 Barre, K. Freel and A. Llored (2018). Genome evolution across 1,011 *saccharomyces*  
628 *cerevisiae* isolates. *Nature* **556**(7701): 339-344.
- 629 Sellis, D., B. J. Callahan, D. A. Petrov and P. W. Messer (2011). Heterozygote advantage  
630 as a natural consequence of adaptation in diploids. *Proceedings of the National Academy*  
631 *of Sciences of the United States of America* **108**(51): 20666-20671.
- 632 Sellis, D., D. J. Kvitek, B. Dunn, G. Sherlock and D. A. Petrov (2016). Heterozygote  
633 advantage is a common outcome of adaptation in *saccharomyces cerevisiae*. *Genetics*  
634 *Soc America*.
- 635 Smukowski Heil, C. S., C. G. DeSevo, D. A. Pai, C. M. Tucker, M. L. Hoang and M. J.  
636 Dunham (2017). Loss of heterozygosity drives adaptation in hybrid yeast. *Molecular*  
637 *biology and evolution* **34**(7): 1596-1612.
- 638 Sondek, J., A. Bohm, D. G. Lambright, H. E. Hamm and P. B. Sigler (1996). Crystal  
639 structure of a ga protein  $\beta$ dimer at 2.1 Å resolution. *Nature* **379**(6563): 369-374.
- 640 Szulkin, M., N. Bierne and P. David (2010). Heterozygosity-fitness correlations: A time for  
641 reappraisal. *Evolution* **64**(5): 1202-1217.
- 642 Thorvaldsdóttir, H., J. T. Robinson and J. P. Mesirov (2013). Integrative genomics viewer  
643 (igv): High-performance genomics data visualization and exploration. *Briefings in*  
644 *Bioinformatics* **14**(2): 178-192.
- 645 Wickham, H. (2016). Ggplot2: Elegant graphics for data analysis, Springer-Verlag New  
646 York.
- 647

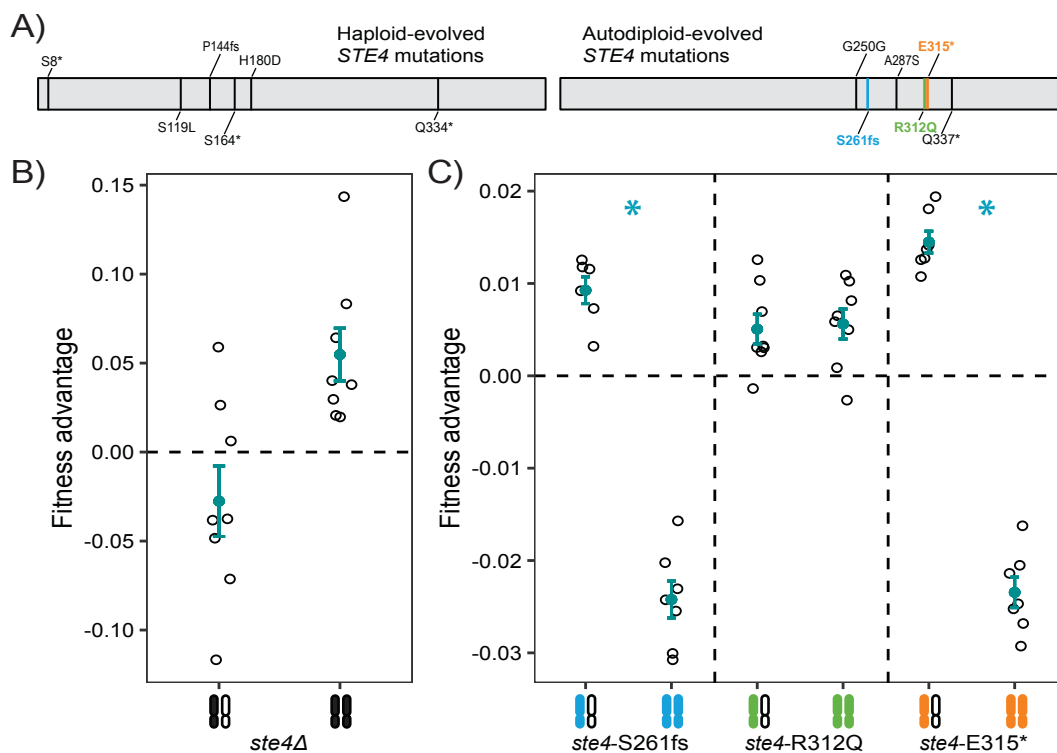

**Figure 1.** Adaptive *STE4* mutations differ between haploid and autodiploid populations. **A)** Mutations previously identified in the *STE4* gene in haploid (Lang *et al.* 2013) and autodiploid (Fisher *et al.* 2018) populations. The positions of mutations across the coding sequence of *STE4* in haploid populations did not deviate from random expectation ( $X^2(1, N=6) = 0.74363, p=0.39$ ). Conversely, autodiploid mutations accumulated nonrandomly across the linear 1,276 bp sequence of the *STE4* gene, ( $X^2(1, N=6) = 18.76, p < 10^{-4}$ ). Bolded mutations are ones that were selected for reconstruction. **B)** Deletion of *STE4* is deleterious in autodiploids when heterozygous and beneficial when homozygous. **C)** Three evolved autodiploid alleles were reconstructed in an ancestral background. *ste4-S261fs* and *ste4-E315\** are overdominant in the ancestral background. **B-C)** A filled and open chromosome represents heterozygosity and two filled chromosomes represents homozygosity. Open points are fitness measures of eight biological replicates following *MATa/a* conversion. Filled points show mean fitness  $\pm$  standard error.

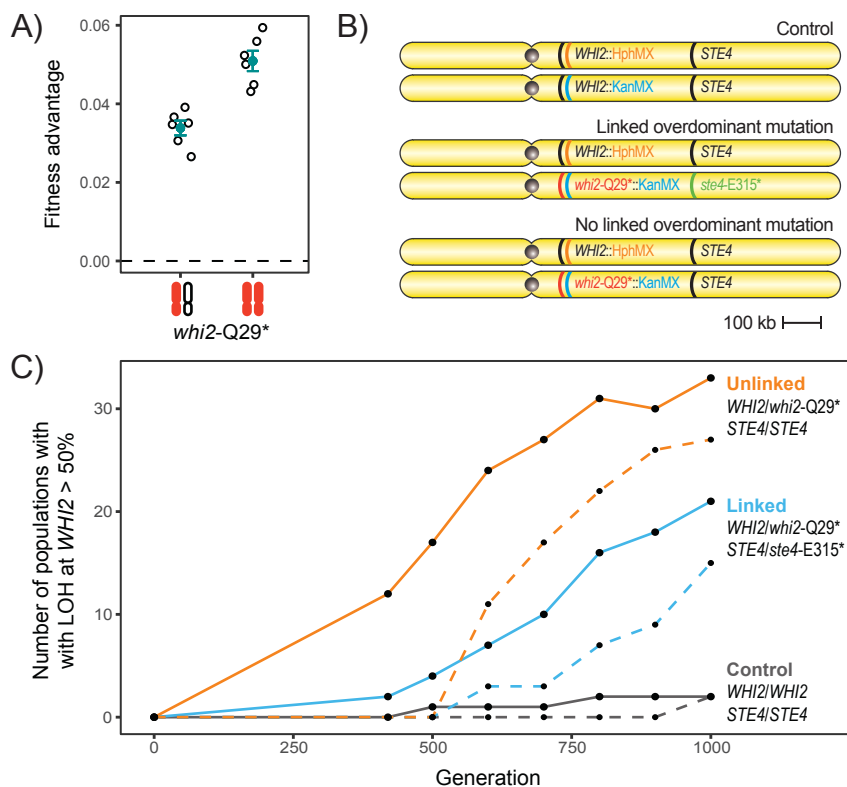

**Figure 2.** The presence of a linked overdominant *STE4* mutation restricts, but does not prevent, loss of heterozygosity at *WHI2*. **A)** An evolved *Q29\** in the *WHI2* gene, which is centromeric to *STE4*, reported in (Fisher *et al.* 2018) is partially dominant and most beneficial when homozygous. A filled and open chromosome represents heterozygosity and two filled chromosomes represents homozygosity. Open points are fitness measures of eight biological replicates following *MATa/a* conversion. Filled points show mean fitness  $\pm$  SE. **B)** Schematic of the three genotypes that were constructed for an evolution experiment. LOH in any genotype is determined by loss of double drug resistance and the direction of the LOH is determined by the single drug to which resistance is lost. **C)** 288 populations (96 *whi2-Q29\*/WHI2 STE4/STE4*, 96 *whi2-Q29\*/WHI2 ste4-E315\*/STE4*, 95 wild-type control) were evolved for 1,000 generations. Solid lines show the number of populations with detected LOH over time. Dashed lines show the number of populations in which *whi2-Q29\** homozygous genotypes were fixed. Lines are colored by group (orange: *ste4-E315\** linked, blue: *STE4* wild-type, black: control). LOH of *whi2-Q29\** was observed in a higher fraction of unlinked populations at generation 420 (Fisher's exact,  $p=0.001$ ), however, the difference becomes smaller over time and is nonsignificant at generation 1,000 (Fisher's exact,  $p=0.08$ ). At generation 1,000, *WHI2* LOH was detectable in 33 *whi2-Q29\* STE4* populations, 21 *whi2-Q29\* ste4-E315\** populations, and 2 control populations.

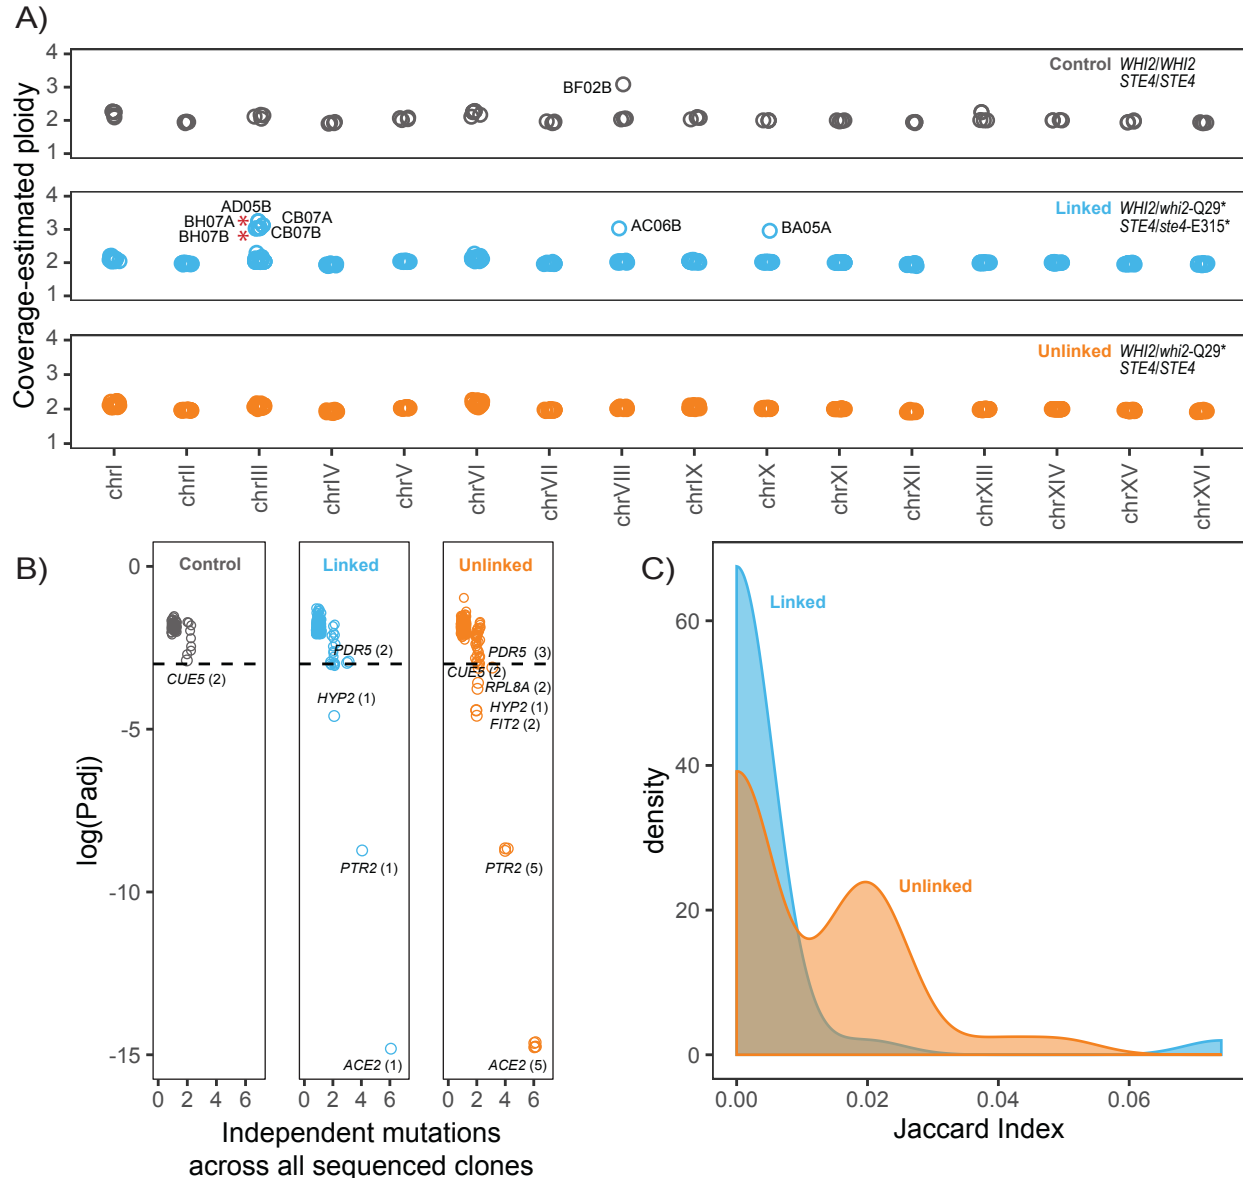

**Figure 3.** Populations with linked partially dominant and overdominant mutations show less parallelism and more varied evolutionary outcomes. **A)** Copy number of each chromosome based on median read depth in control populations (top, black), *whi2-Q29\* ste4-E315\** populations (middle, blue), and *whi2-Q29\* STE4* populations (bottom, orange). Chromosome XV is diploid in all populations indicating that LOH is not due to chromosome loss. Trisomy of three different chromosomes were detected. Aneuploidy was observed in 6 total populations, 5 of which contained an overdominant *STE4* mutation. Red asterisks indicate populations with Chromosome III trisomy that did not lose *ste4-E315\** heterozygosity. No aneuploidies were detected in genotypes with only *whi2-Q29\** mutations. **B)** A probability of recurrence method (6) was used to identify genes receiving significantly more mutations than expected by chance. Points are jittered on both axes to show overlapping data. A threshold of  $p < 0.05$  identifies seven genes as being targets of adaptive mutations in the 20 populations examined. Only 5 of the 21 total mutations in these genes occur in *ste4-E315\** linked populations. **C)** Distribution of Jaccard Indices amongst pairwise comparisons of *whi2-Q29\* ste4-E315\** and *whi2-Q29\* STE4* populations. The  $J$  distribution of linked populations is shifted significantly lower than the  $J$  distribution of unlinked populations (Wilcoxon rank-sum,  $W_{linked} = 402$ ,  $W_{unlinked} = 894$ ,  $p < 0.001$ ). **A-C)** Points and lines are colored by genotype: (black: control, blue: *whi2-Q29\* ste4-E315\**, orange: *whi2-Q29\* STE4*).
